# Supplementary material
Source: Springer Nature journal article supplement (https://www.springermedizin.de/resource/supplementary/12891_2013_2098_MOESM8_ESM.pdf/9509380)

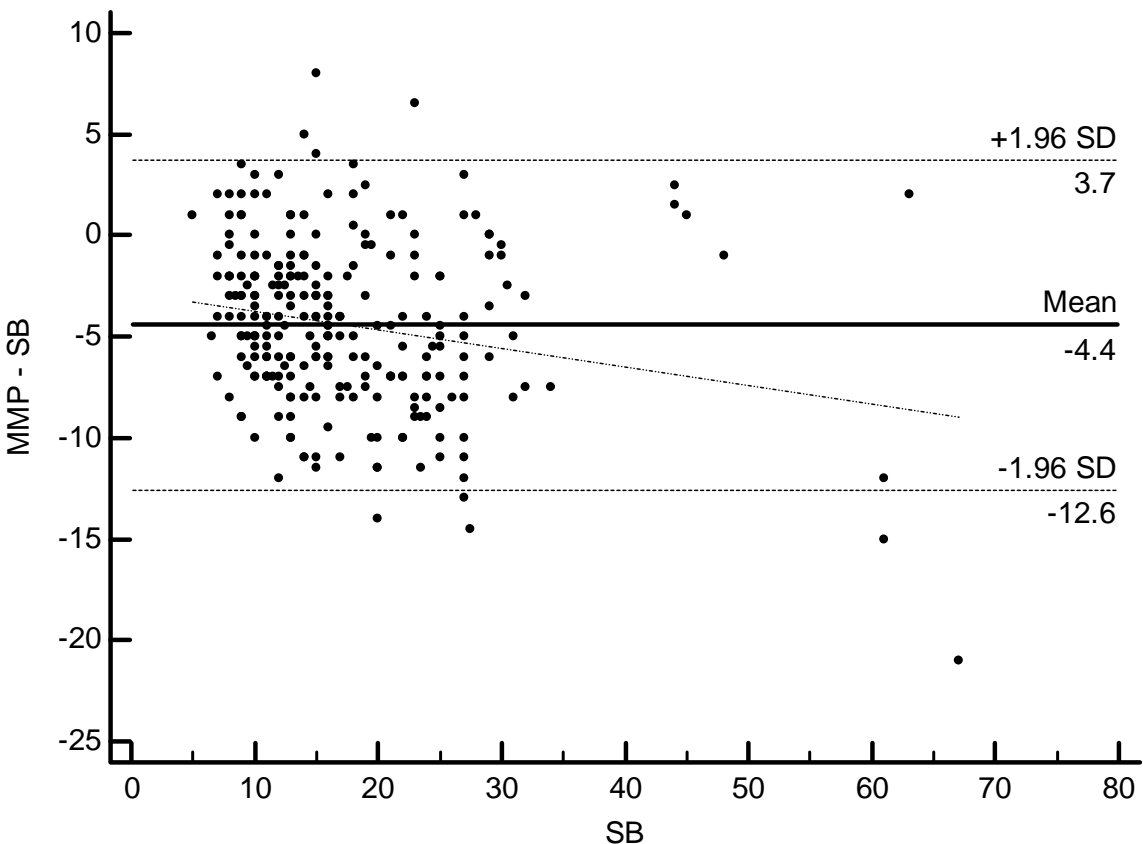

Supplement: MOESM8 [file 9509380]
